# Supplementary material for: Odor coding of nestmate recognition in the eusocial ant Camponotus floridanus
Source: Oxford University Press journal article supplement (doi:10.1242/jeb.215400), 2020-01-01
Supplement: jeb215400supp.pdf [file jeb215400supp.pdf]

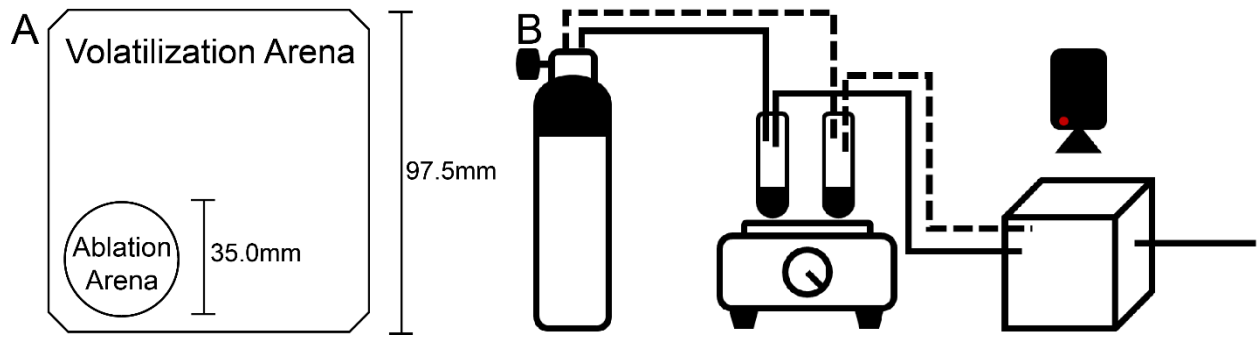

**Fig. S1**

Comparison of the aggression bioassay arenas (A) and a schematic of the volatilization bioassay (B).

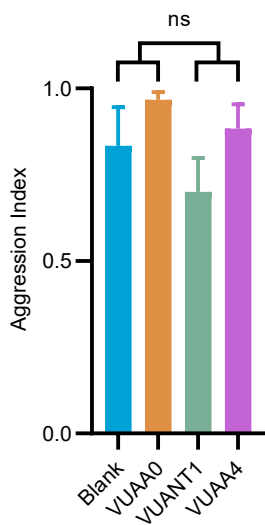

**Fig. S2**

Aggression (biting and wide opening of the mandibles) of individual ants in response to a mechanical stimulus from a Von Frey filament. There is no significant difference in aggression between ants exposed to either heated-air alone (Blank), VUAA0, VUANT1, or VUAA4 (Kruskal-Wallis test, Biological Replicates: Blank=11, VUAA0=10, VUANT1=10, VUAA4=10). Bars display mean. Error bars display S.E.M.

**Table S1.** Summary of statistical test results.

[Click here to Download Table S1](#)
